# Supplementary material for: New Clox Systems for Rapid and Efficient Gene Disruption in Candida albicans
Source: PLOS journal article supplement (doi:10.1371/journal.pone.0100390), 2014-06-18

**Figure S2. Structure of the Clp-NAT plasmid, for targeting *NAT1* to the *RPS1* locus.** Note that the *NAT1* marker is present with a FLP-resolvable cassette [19], which permits recycling of this marker if necessary. The *NAT1* flipper cassette (including the *NAT1* marker (NatR), the *SAP2p*-regulated *FLP1* resolvase gene, and the FRT sites [arrow heads]), the *RPS1* sequence (for targeting integration at the *C. albicans* *RPS1* locus), and *E. coli* plasmid sequences (ColE1, AMP<sup>R</sup> marker, m13F) are indicated.

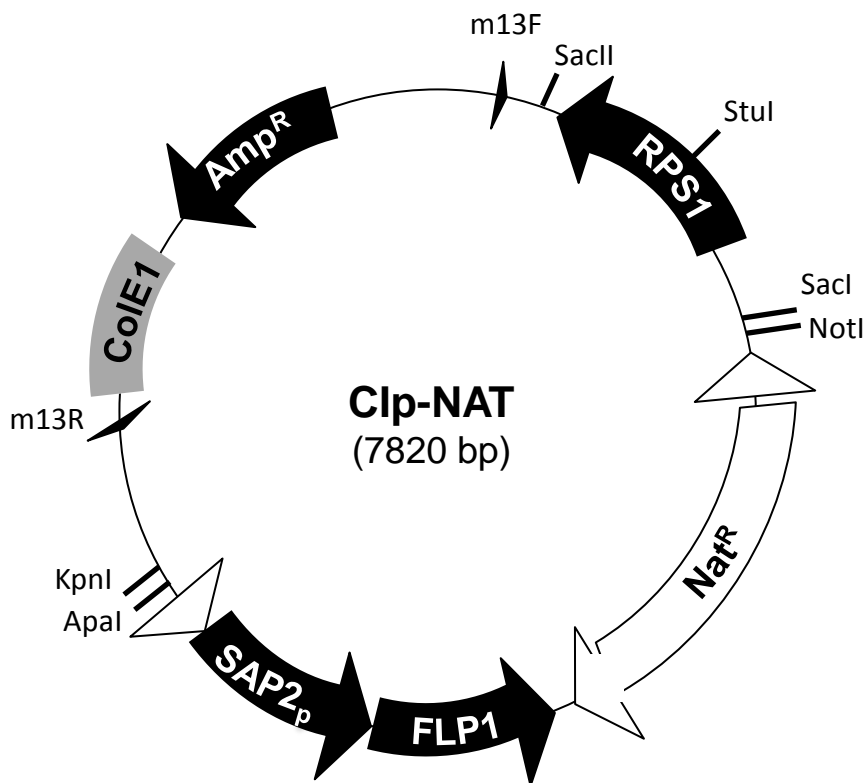

Supplement: S2 (10.1371/journal.pone.0100390.s002) [file journal.pone.0100390.s002]
